# Supplementary material for: Method for identification of condition-associated public antigen receptor sequences
Source: eLife journal article supplement (doi:10.7554/elife.33050), 2018-03-13
Supplement: supp [file elife-33050-supp-v1.zip]

Archive with 1 entries (1 files):
- elife_poa_e33050_Transparent_Reporting_File.pdf
